# Supplementary material
Source: MDPI journal article supplement (https://www.mdpi.com/1424-8247/17/5/643)
Supplement: s1 [file s1]

**Table S10.** Chemicals and reagents used in UFLC-Q-TOF-MS/MS

| <b>Chemicals and reagents</b>          | <b>Supplier</b>                                                                                    |
|----------------------------------------|----------------------------------------------------------------------------------------------------|
| Notoginsenoside R <sub>1</sub>         | National Institute for Control of Biological and Pharmaceutical Products of China (Beijing, China) |
| Ginsenoside Rb <sub>1</sub>            |                                                                                                    |
| Ginsenoside Rg <sub>1</sub>            |                                                                                                    |
| Ginsenoside Re                         |                                                                                                    |
| Ginsenoside Rg <sub>3</sub>            |                                                                                                    |
| Salvianolic acid B                     |                                                                                                    |
| Salvianolic acid C                     |                                                                                                    |
| Protocatechuic aldehyde                |                                                                                                    |
| Cryptotanshinone                       |                                                                                                    |
| Tanshinone II <sub>A</sub>             |                                                                                                    |
| Danshensu sodium salt                  |                                                                                                    |
| Caffeic acid                           |                                                                                                    |
| Rosmarinic acid                        |                                                                                                    |
| Protocatechuic acid                    |                                                                                                    |
| Protopanaxatriol                       | Yuanye Bio-Technology Co., Ltd (Shang hai, China)                                                  |
| Lithospermic acid                      |                                                                                                    |
| Dihydrotanshinone I                    |                                                                                                    |
| Salvianolic acid A                     |                                                                                                    |
| Salvianolic acid D                     |                                                                                                    |
| Ginsenoside Rk <sub>2</sub>            |                                                                                                    |
| Ginsenoside Rk <sub>3</sub>            |                                                                                                    |
| Ginsenoside Rd                         |                                                                                                    |
| Ginsenoside Rg <sub>2</sub>            |                                                                                                    |
| Tanshinone I                           |                                                                                                    |
| [2',3',5',6'-D <sub>4</sub> ]-naringin | Artis-chem Co. Ltd (Shanghai, China)                                                               |
| HPLC-grade acetonitrile                | Thermo Fisher (Fair Lawn, NJ, USA)                                                                 |
| HPLC-grade methanol                    |                                                                                                    |
| HPLC-grade formic acid                 | Macklin (Shanghai, China)                                                                          |
| Fufang Danshen Tablet                  | Hutchison Whampoa Baiyunshan Chinese Medicine Co., Ltd (Guangzhou, China)                          |
| Atorvastatin calcium tablets           | Pfizer Pharmaceuticals LLC (Vega Baja, USA)                                                        |
