# Supplementary material
Source: MDPI journal article supplement (https://www.mdpi.com/1424-8247/17/5/643)
Supplement: s1 [file s1]

**Table S2.** Identification of the chemical constituents in Fufang Danshen Tablet (FDT)

| N. | Identification                      | T <sub>R</sub><br>(min) | Formula                                                       | [M+H] <sup>+</sup><br>(error, ppm) | [M-H] <sup>-</sup><br>(error, ppm) | Fragment ions in positive (+) ion<br>mode                                                                                                                                                               | Fragment ions in negative (-) ion<br>mode                                                                                                                      | Source |
|----|-------------------------------------|-------------------------|---------------------------------------------------------------|------------------------------------|------------------------------------|---------------------------------------------------------------------------------------------------------------------------------------------------------------------------------------------------------|----------------------------------------------------------------------------------------------------------------------------------------------------------------|--------|
| 1  | Stachyose                           | 2.11                    | C <sub>24</sub> H <sub>42</sub> O <sub>21</sub>               | 667.2295<br>(0.5)                  | 665.2167<br>(3.2)                  | 487.1631[M+H-Glc-H <sub>2</sub> O] <sup>+</sup><br>325.1135[M+H-2Glc-H <sub>2</sub> O] <sup>+</sup>                                                                                                     | 485.1509[M-H-Glc-H <sub>2</sub> O] <sup>-</sup>                                                                                                                | DS     |
| 2  | Sucrose                             | 2.18                    | C <sub>12</sub> H <sub>22</sub> O <sub>11</sub>               | 343.1234<br>(-0.3)                 | 341.1088<br>(-0.5)                 | 307.1228[M+H-2H <sub>2</sub> O] <sup>+</sup><br>163.0587[M+H-Glc-H <sub>2</sub> O] <sup>+</sup><br>145.0485[M+H-Glc-2H <sub>2</sub> O] <sup>+</sup><br>127.0380[M+H-Glc-3H <sub>2</sub> O] <sup>+</sup> | 179.0556[M-H-Glc] <sup>-</sup><br>119.0343[M-H-Glc-COOH-CH <sub>3</sub> ] <sup>-</sup>                                                                         | DS     |
| 3  | Raffinose                           | 2.24                    | C <sub>18</sub> H <sub>32</sub> O <sub>16</sub>               | 505.1758<br>(-0.9)                 | 503.1616<br>(-0.2)                 | 325.1137[M+H-Glc-H <sub>2</sub> O] <sup>+</sup><br>163.0598[M+H-2Glc-H <sub>2</sub> O] <sup>+</sup>                                                                                                     | ND                                                                                                                                                             | DS     |
| 4  | Dencichin*                          | 2.30                    | C <sub>5</sub> H <sub>8</sub> N <sub>2</sub> O <sub>5</sub>   | 177.0507<br>(0.8)                  | ND                                 | 160.0250[M+H-NH <sub>3</sub> ] <sup>+</sup><br>116.0345[M+H-CO <sub>2</sub> -NH <sub>3</sub> ] <sup>+</sup><br>88.0380[M+H-CO <sub>2</sub> -NH <sub>3</sub> -CO] <sup>+</sup>                           | ND                                                                                                                                                             | SQ     |
| 5  | Adenosine                           | 2.32                    | C <sub>10</sub> H <sub>13</sub> N <sub>5</sub> O <sub>4</sub> | 268.1037<br>(-1.0)                 | ND                                 | 136.0615[M+H-C <sub>5</sub> H <sub>8</sub> O <sub>4</sub> ] <sup>+</sup>                                                                                                                                | ND                                                                                                                                                             | SQ     |
| 6  | Pyroglutamate                       | 2.83                    | C <sub>5</sub> H <sub>7</sub> NO <sub>3</sub>                 | 130.0494<br>(-2.6)                 | 128.0353<br>(-0.4)                 | 84.0439[M+H-H <sub>2</sub> O-CO] <sup>+</sup>                                                                                                                                                           | 82.0265[M-H-H <sub>2</sub> O-CO] <sup>-</sup>                                                                                                                  | DS     |
| 7  | Succinic acid*                      | 3.05                    | C <sub>4</sub> H <sub>6</sub> O <sub>4</sub>                  | ND                                 | 117.0193<br>(-0.4)                 | ND                                                                                                                                                                                                      | 99.0077[M-H-H <sub>2</sub> O] <sup>-</sup><br>73.0290[M-H-CO <sub>2</sub> ] <sup>-</sup>                                                                       | DS     |
| 8  | Danshensu*                          | 4.17                    | C <sub>9</sub> H <sub>10</sub> O <sub>5</sub>                 | ND                                 | 197.0464<br>(1.9)                  | ND                                                                                                                                                                                                      | 179.0348[M-H-H <sub>2</sub> O] <sup>-</sup><br>135.0447[M-H-CO <sub>2</sub> -H <sub>2</sub> O] <sup>-</sup><br>123.0446[M-H-2CO-H <sub>2</sub> O] <sup>-</sup> | DS     |
| 9  | Protocatechuic acid*                | 4.84                    | C <sub>7</sub> H <sub>6</sub> O <sub>4</sub>                  | ND                                 | 153.0193<br>(-0.4)                 | ND                                                                                                                                                                                                      | 109.0281[M-H-CO <sub>2</sub> ] <sup>-</sup><br>108.0195[M-H-COOH] <sup>-</sup>                                                                                 | DS     |
| 10 | Pseudoginsenoside Rt <sub>5</sub> * | 4.94                    | C <sub>36</sub> H <sub>62</sub> O <sub>10</sub>               | 655.4408<br>(-0.6)                 | ND                                 | 637.4310[M+H-H <sub>2</sub> O] <sup>+</sup><br>457.3622[M+H-2H <sub>2</sub> O-Glc] <sup>+</sup><br>439.3566[M+H-3H <sub>2</sub> O-Glc] <sup>+</sup><br>143.1053[Glc-H <sub>2</sub> O] <sup>+</sup>      | ND                                                                                                                                                             | SQ     |
| 11 | Ginsenoside F <sub>1</sub>          | 5.61                    | C <sub>36</sub> H <sub>62</sub> O <sub>9</sub>                | 639.4459<br>(-0.5)                 | ND                                 | 621.4290[M+H-H <sub>2</sub> O] <sup>+</sup><br>603.4302[M+H-2H <sub>2</sub> O] <sup>+</sup><br>441.3713[M+H-2H <sub>2</sub> O-Glc] <sup>+</sup><br>423.3638[M+H-3H <sub>2</sub> O-Glc] <sup>+</sup>     | ND                                                                                                                                                             | SQ     |
| 12 | Unknow                              | 5.63                    | C <sub>22</sub> H <sub>32</sub> O <sub>13</sub>               | ND                                 | 503.1771<br>(0.1)                  | ND                                                                                                                                                                                                      | 341.1249[M-H-Glc] <sup>-</sup>                                                                                                                                 | SQ     |
| 13 | Protocatechualdehyde*               | 5.68                    | C <sub>7</sub> H <sub>6</sub> O <sub>3</sub>                  | 139.0385<br>(-3.5)                 | 137.0244<br>(0.1)                  | 93.0325[M+H-H <sub>2</sub> O-CO] <sup>+</sup><br>65.0386[M+H-CHO-COOH] <sup>+</sup>                                                                                                                     | 136.0159[M-H-H] <sup>-</sup><br>108.0204[M-H-CHO] <sup>-</sup><br>92.0259[M-H-COOH] <sup>-</sup>                                                               | DS     |

|    |                                  |      |                                                 |                    |                    |                                                                                                                                                                                                                            |                                                                                                                                                                                                                                                                     |    |
|----|----------------------------------|------|-------------------------------------------------|--------------------|--------------------|----------------------------------------------------------------------------------------------------------------------------------------------------------------------------------------------------------------------------|---------------------------------------------------------------------------------------------------------------------------------------------------------------------------------------------------------------------------------------------------------------------|----|
| 14 | Caffeic acid*                    | 6.01 | C <sub>9</sub> H <sub>8</sub> O <sub>4</sub>    | ND                 | 179.0351<br>(0.6)  | ND                                                                                                                                                                                                                         | 135.0445[M-H-CO <sub>2</sub> ] <sup>-</sup><br>134.0358[M-H-COOH] <sup>-</sup>                                                                                                                                                                                      | DS |
| 15 | Quercetin                        | 6.03 | C <sub>15</sub> H <sub>10</sub> O <sub>7</sub>  | 303.0501<br>(0.4)  | ND                 | 257.0448[M+H-H <sub>2</sub> O-CO] <sup>+</sup><br>229.0480[M+H-H <sub>2</sub> O-2CO] <sup>+</sup><br>183.0456[M+H-C <sub>4</sub> H <sub>8</sub> O <sub>4</sub> ] <sup>+</sup>                                              | ND                                                                                                                                                                                                                                                                  | SQ |
| 16 | Quercetin 3-sambubioside         | 6.04 | C <sub>26</sub> H <sub>28</sub> O <sub>16</sub> | 597.1449<br>(-0.3) | 595.1322<br>(2.9)  | 465.1012[M+H-Ara] <sup>+</sup><br>303.0500[M+H-Ara-Glc] <sup>+</sup>                                                                                                                                                       | 301.0361[M-H-Glc-Ara] <sup>-</sup>                                                                                                                                                                                                                                  | SQ |
| 17 | Notoginsenoside C                | 6.19 | C <sub>54</sub> H <sub>92</sub> O <sub>25</sub> | ND                 | 1139.5919<br>(4.9) | ND                                                                                                                                                                                                                         | 1093.5882[M-H-H <sub>2</sub> O-CO] <sup>-</sup>                                                                                                                                                                                                                     | SQ |
| 18 | Yunnaneic acid D                 | 6.48 | C <sub>27</sub> H <sub>24</sub> O <sub>12</sub> | ND                 | 539.1206<br>(2.1)  | ND                                                                                                                                                                                                                         | 521.1001[M-H-H <sub>2</sub> O] <sup>-</sup><br>359.0785[M-H-C <sub>9</sub> H <sub>8</sub> O <sub>4</sub> ] <sup>-</sup><br>341.0680[M-H-DSS] <sup>-</sup><br>197.0457[DSS-H] <sup>-</sup><br>179.0329[C <sub>9</sub> H <sub>8</sub> O <sub>4</sub> -H] <sup>-</sup> | DS |
| 19 | Salviaflaside                    | 6.53 | C <sub>24</sub> H <sub>26</sub> O <sub>13</sub> | 523.1436<br>(-2.0) | 521.1312<br>(-0.3) | 361.0946[M+H-Glc] <sup>+</sup><br>325.0949[M+H-Glc-2H <sub>2</sub> O] <sup>+</sup><br>163.0387[Glc+H] <sup>+</sup>                                                                                                         | 359.0775[M-H-Glc] <sup>-</sup><br>323.0782[M-H-DSS] <sup>-</sup><br>197.0437[DSS-H] <sup>-</sup><br>179.0334[CA-H] <sup>-</sup>                                                                                                                                     | DS |
| 20 | Yunnaneic acid F                 | 6.55 | C <sub>29</sub> H <sub>26</sub> O <sub>14</sub> | ND                 | 597.1264<br>(1.7)  | ND                                                                                                                                                                                                                         | 553.1315[M-H-CO <sub>2</sub> ] <sup>-</sup><br>417.0781[M-H-C <sub>9</sub> H <sub>8</sub> O <sub>4</sub> ] <sup>-</sup><br>197.0431[DSS-H] <sup>-</sup><br>179.0431[C <sub>9</sub> H <sub>8</sub> O <sub>4</sub> -H] <sup>-</sup>                                   | DS |
| 21 | Notoginsenoside T <sub>5</sub>   | 6.94 | C <sub>41</sub> H <sub>68</sub> O <sub>12</sub> | 753.4778<br>(-0.7) | ND                 | 441.3729[M+H-Xyl-Glc-H <sub>2</sub> O] <sup>+</sup><br>423.3624[M+H-Xyl-Glc-2H <sub>2</sub> O] <sup>+</sup>                                                                                                                | ND                                                                                                                                                                                                                                                                  | SQ |
| 22 | Notoginsenoside R <sub>1</sub> * | 6.96 | C <sub>47</sub> H <sub>80</sub> O <sub>18</sub> | 933.5420<br>(0.3)  | 931.5311<br>(4.2)  | 753.4961[M+H-Glc-H <sub>2</sub> O] <sup>+</sup><br>621.4225[M+H-Glc-H <sub>2</sub> O-Xyl] <sup>+</sup><br>441.3763[M+H-2Glc-Xyl-2H <sub>2</sub> O] <sup>+</sup><br>423.3599[M+H-2Glc-Xyl-3H <sub>2</sub> O] <sup>+</sup>   | 799.4881[M-H-Xyl] <sup>-</sup>                                                                                                                                                                                                                                      | SQ |
| 23 | Salvianolic acid D*              | 7.17 | C <sub>20</sub> H <sub>18</sub> O <sub>10</sub> | ND                 | 417.0831<br>(1.0)  | ND                                                                                                                                                                                                                         | 197.0451[DSS-H] <sup>-</sup><br>179.0338[C <sub>9</sub> H <sub>8</sub> O <sub>4</sub> -H] <sup>-</sup><br>174.0291[M-H-DSS-COOH] <sup>-</sup>                                                                                                                       | DS |
| 24 | Ginsenoside Re*                  | 7.39 | C <sub>48</sub> H <sub>82</sub> O <sub>18</sub> | 947.5573<br>(-0.2) | ND                 | 767.4891[M+H-Glc-H <sub>2</sub> O] <sup>+</sup><br>441.3710[M+H-2Glc-Rha-2H <sub>2</sub> O] <sup>+</sup><br>423.3576[M+H-2Glc-Rha-3H <sub>2</sub> O] <sup>+</sup><br>405.3512[M+H-2Glc-Rha-4H <sub>2</sub> O] <sup>+</sup> | ND                                                                                                                                                                                                                                                                  | SQ |
| 25 | Ginsenoside Rg <sub>1</sub> *    | 7.54 | C <sub>42</sub> H <sub>72</sub> O <sub>14</sub> | 801.4990<br>(-0.6) | ND                 | 621.4339[M+H-Glc-H <sub>2</sub> O] <sup>+</sup><br>441.3739[M+H-2Glc-2H <sub>2</sub> O] <sup>+</sup><br>423.3614[M+H-2Glc-3H <sub>2</sub> O] <sup>+</sup>                                                                  | ND                                                                                                                                                                                                                                                                  | SQ |
| 26 | Rosmarinic acid*                 | 8.13 | C <sub>18</sub> H <sub>16</sub> O <sub>8</sub>  | 361.0916<br>(-0.4) | 359.0781<br>(2.0)  | 163.0384[M+H-DSS] <sup>+</sup><br>145.0275[M+H-DSS-H <sub>2</sub> O] <sup>+</sup>                                                                                                                                          | 197.0453[DSS-H] <sup>-</sup><br>179.0344[CA-H] <sup>-</sup><br>161.0239[M-H-DSS] <sup>-</sup>                                                                                                                                                                       | DS |

|    |                                        |       |                                                  |                     |                    |                                                                                                                                                                                                        |                                                                                                                                                                                                                 |    |
|----|----------------------------------------|-------|--------------------------------------------------|---------------------|--------------------|--------------------------------------------------------------------------------------------------------------------------------------------------------------------------------------------------------|-----------------------------------------------------------------------------------------------------------------------------------------------------------------------------------------------------------------|----|
| 27 | Salvianolic acid A*                    | 8.66  | C <sub>26</sub> H <sub>22</sub> O <sub>10</sub>  | ND                  | 493.1156<br>(2.0)  | ND                                                                                                                                                                                                     | 313.0720[M-H-CA] <sup>-</sup><br>295.0621[M-H-DSS] <sup>-</sup><br>197.0446[DSS-H] <sup>-</sup>                                                                                                                 | DS |
| 28 | Lithospermic acid*                     | 8.66  | C <sub>27</sub> H <sub>22</sub> O <sub>12</sub>  | 539.1179<br>(-0.9)  | 537.1050<br>(2.2)  | 521.1080[M+H-H <sub>2</sub> O] <sup>+</sup><br>323.0545[M+H-H <sub>2</sub> O-DSS] <sup>+</sup>                                                                                                         | 313.0728[M-H-CA-CO <sub>2</sub> ] <sup>-</sup><br>295.0617[M-H-DSS-CO <sub>2</sub> ] <sup>-</sup><br>197.0455[DSS-H] <sup>-</sup>                                                                               | DS |
| 29 | Salvianolic acid B*                    | 9.66  | C <sub>36</sub> H <sub>30</sub> O <sub>16</sub>  | 719.1602<br>(-0.6)  | 717.1491<br>(4.2)  | 521.1070[M+H-DSS] <sup>+</sup><br>493.1097[M+H-DSS-CO] <sup>+</sup><br>323.0551[M+H-DSS-C <sub>9</sub> H <sub>8</sub> O <sub>4</sub> -H <sub>2</sub> O] <sup>+</sup>                                   | 519.0946[M-H-DSS] <sup>-</sup><br>339.0516[M-H-DSS-C <sub>9</sub> H <sub>8</sub> O <sub>4</sub> ] <sup>-</sup><br>321.0416[M-H-DSS-C <sub>9</sub> H <sub>8</sub> O <sub>4</sub> -H <sub>2</sub> O] <sup>-</sup> | DS |
| 30 | Salvianolic acid A isomer              | 11.38 | C <sub>26</sub> H <sub>22</sub> O <sub>10</sub>  | ND                  | 493.1148<br>(1.7)  | ND                                                                                                                                                                                                     | 313.0741[M-H-CA] <sup>-</sup><br>295.0611[M-H-DSS] <sup>-</sup><br>179.0345[CA-H] <sup>-</sup>                                                                                                                  | DS |
| 31 | Dimethyl Lithospermate                 | 13.98 | C <sub>29</sub> H <sub>26</sub> O <sub>12</sub>  | 567.1495<br>(-0.4)  | 565.1370<br>(2.1)  | 369.0980[M+H-DSS] <sup>+</sup><br>295.0604[M+H-DSS-2CO-H <sub>2</sub> O] <sup>+</sup>                                                                                                                  | 519.0971[M-H-H <sub>2</sub> O-CO] <sup>-</sup><br>367.0843[M-H-DSS] <sup>-</sup><br>339.0514[M-H-DSS-CO] <sup>-</sup><br>321.0406[M-H-DSS-CO-H <sub>2</sub> O] <sup>-</sup>                                     | DS |
| 32 | Ethyl lithospermate                    | 15.61 | C <sub>29</sub> H <sub>26</sub> O <sub>12</sub>  | 567.1500<br>(0.5)   | 565.1370<br>(2.1)  | 521.1096[M+H-CO-H <sub>2</sub> O] <sup>+</sup><br>493.1017[M+H-2CO-H <sub>2</sub> O] <sup>+</sup><br>323.0580[M+H-CO-H <sub>2</sub> O-DSS] <sup>+</sup>                                                | 367.0820[M-H-DSS] <sup>-</sup><br>321.0410[M-H-DSS-CO-H <sub>2</sub> O] <sup>-</sup>                                                                                                                            | DS |
| 33 | Notoginsenoside Fa*                    | 18.67 | C <sub>59</sub> H <sub>100</sub> O <sub>27</sub> | ND                  | 1239.6455<br>(4.4) | ND                                                                                                                                                                                                     | 1239.6504<br>1107.6153[M-H-Xyl] <sup>-</sup>                                                                                                                                                                    | SQ |
| 34 | Notoginsenoside R <sub>2</sub> /isomer | 18.79 | C <sub>41</sub> H <sub>70</sub> O <sub>13</sub>  | ND                  | 769.4778<br>(4.4)  | ND                                                                                                                                                                                                     | 637.4372[M-H-Xyl] <sup>-</sup><br>475.3788[M-H-Xyl-Glc] <sup>-</sup>                                                                                                                                            | SQ |
| 35 | Ginsenoside Rb <sub>1</sub> *          | 18.88 | C <sub>54</sub> H <sub>92</sub> O <sub>23</sub>  | 1109.6101<br>(-0.1) | 1107.6025<br>(3.4) | 767.4943[M+H-2Glc-H <sub>2</sub> O] <sup>+</sup><br>605.4400[M+H-3Glc-H <sub>2</sub> O] <sup>+</sup><br>425.3778[M+H-4Glc-2H <sub>2</sub> O] <sup>+</sup>                                              | 1107.6039                                                                                                                                                                                                       | SQ |
| 36 | Ginsenoside Rh <sub>3</sub>            | 18.89 | C <sub>36</sub> H <sub>60</sub> O <sub>7</sub>   | 605.4408<br>(-0.7)  | ND                 | 587.4431[M+H-H <sub>2</sub> O] <sup>+</sup><br>425.3914[M+H-H <sub>2</sub> O-Glc] <sup>+</sup><br>407.3692[M+H-2H <sub>2</sub> O-Glc] <sup>+</sup>                                                     | ND                                                                                                                                                                                                              | SQ |
| 37 | Ginsenoside Rg <sub>2</sub> *          | 18.89 | C <sub>42</sub> H <sub>72</sub> O <sub>13</sub>  | 785.5049<br>(0.5)   | 783.4927<br>(1.1)  | 605.4372[M+H-ORha-H <sub>2</sub> O] <sup>+</sup><br>425.3756[M+H-ORha-Glc-2H <sub>2</sub> O] <sup>+</sup>                                                                                              | 637.4336[M-H-Rha] <sup>-</sup>                                                                                                                                                                                  | SQ |
| 38 | Malonylginsenoside Rb <sub>1</sub>     | 18.99 | C <sub>57</sub> H <sub>94</sub> O <sub>26</sub>  | 1195.6106<br>(0)    | 1193.6006<br>(3.6) | 1015.4980[M+H-H <sub>2</sub> O-Glc] <sup>+</sup><br>835.4798[M+H-2Glc-2H <sub>2</sub> O] <sup>+</sup><br>673.4200[M+H-3Glc-2H <sub>2</sub> O] <sup>+</sup>                                             | 1149.6158[M-H-CO <sub>2</sub> ] <sup>-</sup><br>1107.6050[M-H-C <sub>3</sub> H <sub>2</sub> O <sub>3</sub> ] <sup>-</sup>                                                                                       | SQ |
| 39 | Notoginsenoside A                      | 19.07 | C <sub>54</sub> H <sub>92</sub> O <sub>24</sub>  | ND                  | 1123.5947<br>(1.8) | ND                                                                                                                                                                                                     | 1077.5916[M-H-H <sub>2</sub> O-CO] <sup>-</sup>                                                                                                                                                                 | SQ |
| 40 | Ginsenoside Rk <sub>3</sub> *          | 19.15 | C <sub>36</sub> H <sub>60</sub> O <sub>8</sub>   | 621.4355<br>(-0.9)  | ND                 | 603.4289[M+H-H <sub>2</sub> O] <sup>+</sup><br>441.3725[M+H-Glc-H <sub>2</sub> O] <sup>+</sup><br>423.3631[M+H-Glc-2H <sub>2</sub> O] <sup>+</sup><br>405.3492[M+H-Glc-3H <sub>2</sub> O] <sup>+</sup> | ND                                                                                                                                                                                                              | SQ |

|    |                                        |       |                                                 |                    |                    |                                                                                                                                                                                                    |                                                                                                                                                                                         |    |
|----|----------------------------------------|-------|-------------------------------------------------|--------------------|--------------------|----------------------------------------------------------------------------------------------------------------------------------------------------------------------------------------------------|-----------------------------------------------------------------------------------------------------------------------------------------------------------------------------------------|----|
| 41 | Salvianolic acid F                     | 19.15 | C <sub>17</sub> H <sub>14</sub> O <sub>6</sub>  | ND                 | 313.0717<br>(-0.1) | ND                                                                                                                                                                                                 | 161.0226[CA-H-H <sub>2</sub> O] <sup>-</sup><br>151.0417[CA-H-CO] <sup>-</sup><br>133.0289[M-H-CA] <sup>-</sup>                                                                         | DS |
| 42 | Ginsenoside Rd*                        | 19.25 | C <sub>48</sub> H <sub>82</sub> O <sub>18</sub> | 947.5569<br>(-0.6) | 945.5462<br>(3.5)  | 767.4859 [M+H-Glc-H <sub>2</sub> O] <sup>+</sup><br>605.4373 [M+H-2Glc-H <sub>2</sub> O] <sup>+</sup><br>425.3763 [M+H-3Glc-2H <sub>2</sub> O] <sup>+</sup>                                        | 945.5477                                                                                                                                                                                | SQ |
| 43 | Ginsenoside Rk <sub>2</sub> *          | 19.27 | C <sub>36</sub> H <sub>60</sub> O <sub>7</sub>  | 605.4411<br>(-0.2) | ND                 | 587.4269[M+H-H <sub>2</sub> O] <sup>+</sup><br>551.4097[M+H-3H <sub>2</sub> O] <sup>+</sup><br>425.3812[M+H-H <sub>2</sub> O-Glc] <sup>+</sup><br>407.3680[M+H-2H <sub>2</sub> O-Glc] <sup>+</sup> | ND                                                                                                                                                                                      | SQ |
| 44 | Acetyl-ginsenoside F <sub>1</sub>      | 19.35 | C <sub>38</sub> H <sub>64</sub> O <sub>10</sub> | ND                 | 679.4454<br>(4.0)  | ND                                                                                                                                                                                                 | 619.4284[M-H-HOAc] <sup>-</sup>                                                                                                                                                         | SQ |
| 45 | Hydroxycryptotanshinone/<br>isomer     | 19.40 | C <sub>19</sub> H <sub>20</sub> O <sub>4</sub>  | 313.1435<br>(0.2)  | ND                 | 295.1332[M+H-H <sub>2</sub> O] <sup>+</sup><br>277.1239[M+H-2H <sub>2</sub> O] <sup>+</sup><br>267.1372[M+H-H <sub>2</sub> O-CO] <sup>+</sup><br>255.0994[M+H-2CH <sub>3</sub> -CO] <sup>+</sup>   | ND                                                                                                                                                                                      | DS |
| 46 | Salvianolic acid C*                    | 19.42 | C <sub>26</sub> H <sub>20</sub> O <sub>10</sub> | ND                 | 491.0988<br>(0.9)  | ND                                                                                                                                                                                                 | 447.1073[M-H-CO <sub>2</sub> ] <sup>-</sup><br>293.0480[M-H-DSS] <sup>-</sup><br>197.0433[DSS-H] <sup>-</sup><br>179.0342[C <sub>9</sub> H <sub>8</sub> O <sub>4</sub> -H] <sup>-</sup> | DS |
| 47 | 20(S)-sanchirrhinosides A <sub>2</sub> | 20.09 | C <sub>43</sub> H <sub>72</sub> O <sub>14</sub> | ND                 | 811.4894<br>(3.8)  | ND                                                                                                                                                                                                 | 765.4835[M-H-CO-H <sub>2</sub> O] <sup>-</sup><br>619.4240[M-H-2CH <sub>3</sub> -Glc] <sup>-</sup>                                                                                      | SQ |
| 48 | Tanshinol B                            | 20.22 | C <sub>18</sub> H <sub>16</sub> O <sub>4</sub>  | 297.1122<br>(0.1)  | ND                 | 279.1010[M+H-H <sub>2</sub> O] <sup>+</sup><br>261.0905[M+H-2H <sub>2</sub> O] <sup>+</sup><br>233.0959[M+H-2H <sub>2</sub> O-CO] <sup>+</sup>                                                     | ND                                                                                                                                                                                      | DS |
| 49 | Ginsenoside Rg <sub>3</sub>            | 20.45 | C <sub>42</sub> H <sub>72</sub> O <sub>13</sub> | 785.5048<br>(0.3)  | 783.4929<br>(2.2)  | 749.5063[M+H-2H <sub>2</sub> O] <sup>+</sup><br>443.3958[M+H-2Glc-H <sub>2</sub> O] <sup>+</sup><br>425.3758[M+H-2Glc-2H <sub>2</sub> O] <sup>+</sup>                                              | 621.4244[M-H-Glc] <sup>-</sup>                                                                                                                                                          | SQ |
| 50 | 3β-Hydroxymethylenetanshinquinone      | 20.48 | C <sub>18</sub> H <sub>14</sub> O <sub>4</sub>  | 295.0965<br>(0.1)  | 293.0817<br>(-1)   | 249.0914[M+H-CO-H <sub>2</sub> O] <sup>+</sup><br>221.0956[M+H-H <sub>2</sub> O-2CO] <sup>+</sup>                                                                                                  | 265.0877[M-H-CO] <sup>-</sup><br>250.0647[M-H-CO-CH <sub>3</sub> ] <sup>-</sup>                                                                                                         | DS |
| 51 | Tanshinone II <sub>B</sub>             | 20.59 | C <sub>19</sub> H <sub>18</sub> O <sub>4</sub>  | 311.1279<br>(0.4)  | ND                 | 267.1382[M+H-CO <sub>2</sub> ] <sup>+</sup><br>252.1153[M+H-CO <sub>2</sub> -CH <sub>3</sub> ] <sup>+</sup>                                                                                        | ND                                                                                                                                                                                      | DS |
| 52 | Salvianonol                            | 20.62 | C <sub>18</sub> H <sub>20</sub> O <sub>4</sub>  | 301.1433<br>(-0.4) | ND                 | 283.1334[M+H-H <sub>2</sub> O] <sup>+</sup><br>265.1238[M+H-2H <sub>2</sub> O] <sup>+</sup><br>241.1232[M+H-COOH-CH <sub>3</sub> ] <sup>+</sup>                                                    | ND                                                                                                                                                                                      | DS |
| 53 | Hydroxytanshinone                      | 20.80 | C <sub>19</sub> H <sub>18</sub> O <sub>4</sub>  | 311.1281<br>(0.9)  | ND                 | 293.1183[M+H-H <sub>2</sub> O] <sup>+</sup><br>275.1074[M+H-2H <sub>2</sub> O] <sup>+</sup>                                                                                                        | ND                                                                                                                                                                                      | DS |
| 54 | Nortanshinone                          | 20.81 | C <sub>17</sub> H <sub>12</sub> O <sub>4</sub>  | 281.0807<br>(-0.3) | ND                 | 235.0757[M+H-H <sub>2</sub> O-CO] <sup>+</sup><br>207.0808[M+H-H <sub>2</sub> O-2CO] <sup>+</sup>                                                                                                  | ND                                                                                                                                                                                      | DS |
| 55 | Didehydrotanshinone II <sub>A</sub>    | 20.82 | C <sub>19</sub> H <sub>16</sub> O <sub>3</sub>  | 293.1172<br>(-0.1) | ND                 | 247.0749[M+H-H <sub>2</sub> O-CO] <sup>+</sup><br>219.0803[M+H-H <sub>2</sub> O-2CO] <sup>+</sup>                                                                                                  | ND                                                                                                                                                                                      | DS |

|    |                                          |       |                                                 |                    |                   |                                                                                                                                                                                                                    |                                                                                                                                                   |    |
|----|------------------------------------------|-------|-------------------------------------------------|--------------------|-------------------|--------------------------------------------------------------------------------------------------------------------------------------------------------------------------------------------------------------------|---------------------------------------------------------------------------------------------------------------------------------------------------|----|
| 56 | Panaxydol                                | 21.17 | C <sub>17</sub> H <sub>24</sub> O <sub>2</sub>  | 261.1847<br>(-0.8) | ND                | 168.9769[M+H-C <sub>6</sub> H <sub>4</sub> O] <sup>+</sup><br>141.1260[M+H-C <sub>6</sub> H <sub>4</sub> O-CO] <sup>+</sup>                                                                                        | ND                                                                                                                                                | SQ |
| 57 | Danshenxinkun A                          | 21.30 | C <sub>18</sub> H <sub>16</sub> O <sub>4</sub>  | 297.1123<br>(0.4)  | 295.0981<br>(1.5) | 261.0911[M+H-2H <sub>2</sub> O] <sup>+</sup><br>233.0967[M+H-2H <sub>2</sub> O-CO] <sup>+</sup>                                                                                                                    | 265.0856[M-H-2CH <sub>3</sub> ] <sup>-</sup><br>237.0923[M-H-2CH <sub>3</sub> -CO] <sup>-</sup>                                                   |    |
| 58 | Isocryptotanshinone                      | 21.52 | C <sub>19</sub> H <sub>20</sub> O <sub>3</sub>  | 297.1486<br>(0.3)  | ND                | 253.1585[M+H-CH <sub>3</sub> -CHO] <sup>+</sup><br>238.1347[M+H-CHO-2CH <sub>3</sub> ] <sup>+</sup>                                                                                                                | ND                                                                                                                                                | DS |
| 59 | Neocryptotanshinone isomer               | 21.53 | C <sub>19</sub> H <sub>22</sub> O <sub>4</sub>  | 315.1591<br>(-0.1) | 313.1450<br>(1.4) | 297.1493[M+H-H <sub>2</sub> O] <sup>+</sup><br>253.1592[M+H-H <sub>2</sub> O-CHO-CH <sub>3</sub> ] <sup>+</sup><br>238.1350[M+H-H <sub>2</sub> O-CHO-2CH <sub>3</sub> ] <sup>+</sup>                               | 269.1549[M-H-CHO-CH <sub>3</sub> ] <sup>-</sup><br>213.1280[M-H-CHO-CH <sub>3</sub> -2CO] <sup>-</sup>                                            | DS |
| 60 | Przewaquinone B                          | 21.57 | C <sub>18</sub> H <sub>18</sub> O <sub>4</sub>  | 299.1279<br>(0.3)  | 297.1135<br>(0.9) | 281.1193[M+H-H <sub>2</sub> O] <sup>+</sup><br>263.1066[M+H-2H <sub>2</sub> O] <sup>+</sup><br>235.1086[M+H-2H <sub>2</sub> O-CO] <sup>+</sup>                                                                     | 253.1228[M-H-CHO-CH <sub>3</sub> ] <sup>-</sup><br>209.1338[M-H-2CHO-2CH <sub>3</sub> ] <sup>-</sup>                                              | DS |
| 61 | Dehydromiltirone/ Sibiriquinone A        | 21.90 | C <sub>19</sub> H <sub>20</sub> O <sub>2</sub>  | 281.1536<br>(0.2)  | ND                | 263.1409[M+H-H <sub>2</sub> O] <sup>+</sup><br>252.1154[M+H-CHO] <sup>+</sup><br>238.0980[M+H-CH <sub>3</sub> -CO] <sup>+</sup>                                                                                    | ND                                                                                                                                                | DS |
| 62 | Hydroxycryptotanshinone/ isomer          | 22.00 | C <sub>19</sub> H <sub>20</sub> O <sub>4</sub>  | 313.1433<br>(-0.5) | ND                | 295.1345[M+H-H <sub>2</sub> O] <sup>+</sup><br>277.1248[M+H-2H <sub>2</sub> O] <sup>+</sup><br>269.1536[M+H-CHO-CH <sub>3</sub> ] <sup>+</sup><br>251.1433[M+H-H <sub>2</sub> O-CHO-CH <sub>3</sub> ] <sup>+</sup> | ND                                                                                                                                                | DS |
| 63 | Ginsenoside Rg <sub>5</sub> <sup>*</sup> | 22.21 | C <sub>42</sub> H <sub>70</sub> O <sub>12</sub> | 767.4934<br>(-0.7) | 765.4825<br>(4.0) | 605.4399[M+H-Glc] <sup>+</sup><br>425.3786[M+H-2Glc-H <sub>2</sub> O] <sup>+</sup><br>407.3653[M+H-2Glc-2H <sub>2</sub> O] <sup>+</sup>                                                                            | 719.2866[M-H-CO-H <sub>2</sub> O] <sup>-</sup><br>603.4265[M-H-Glc] <sup>-</sup>                                                                  | SQ |
| 64 | Dihydrotanshinone I <sup>*</sup>         | 22.46 | C <sub>18</sub> H <sub>14</sub> O <sub>3</sub>  | 279.1013<br>(-0.9) | ND                | 233.0967[M+H-CO-H <sub>2</sub> O] <sup>+</sup><br>205.1011[M+H-2CO-H <sub>2</sub> O] <sup>+</sup><br>190.0780[M+H-2CO-H <sub>2</sub> O-CH <sub>3</sub> ] <sup>+</sup>                                              | ND                                                                                                                                                | DS |
| 65 | Horminone                                | 22.66 | C <sub>20</sub> H <sub>28</sub> O <sub>4</sub>  | 333.2064<br>(1.0)  | 331.1918<br>(1.0) | 315.1917[M+H-H <sub>2</sub> O] <sup>+</sup><br>297.1904[M+H-2H <sub>2</sub> O] <sup>+</sup>                                                                                                                        | 301.1810[M-H-2CH <sub>3</sub> ] <sup>-</sup>                                                                                                      | DS |
| 66 | Norsalvioxide                            | 22.66 | C <sub>18</sub> H <sub>24</sub> O <sub>2</sub>  | 273.1847<br>(-0.7) | 271.1707<br>(1.1) | 255.1746[M+H-H <sub>2</sub> O] <sup>+</sup><br>243.1738[M+H-2CH <sub>3</sub> ] <sup>+</sup><br>199.1101[M+H-3CH <sub>3</sub> -CHO] <sup>+</sup>                                                                    | 241.1595[M-H-2CH <sub>3</sub> ] <sup>-</sup><br>199.0769[M-H-CO-CHO-CH <sub>3</sub> ] <sup>-</sup>                                                | DS |
| 67 | Neocryptotanshinone                      | 22.75 | C <sub>19</sub> H <sub>22</sub> O <sub>4</sub>  | 315.1590<br>(-0.2) | 313.1449<br>(1.2) | 297.1479[M+H-H <sub>2</sub> O] <sup>+</sup><br>279.1374[M+H-2H <sub>2</sub> O] <sup>+</sup><br>254.0931[M+H-H <sub>2</sub> O-CO-CH <sub>3</sub> ] <sup>+</sup>                                                     | 283.1351[M-H-2CH <sub>3</sub> ] <sup>-</sup><br>267.1396[M-H-CO-H <sub>2</sub> O] <sup>-</sup><br>255.1398[M-H-2CH <sub>3</sub> -CO] <sup>-</sup> | DS |
| 68 | Microstegiol                             | 22.78 | C <sub>20</sub> H <sub>26</sub> O <sub>2</sub>  | 299.2003<br>(-0.8) | 297.1861<br>(0.5) | 257.1543[M+H-C <sub>3</sub> H <sub>6</sub> ] <sup>+</sup><br>229.1227[M+H-CO-C <sub>3</sub> H <sub>6</sub> ] <sup>+</sup>                                                                                          | 282.1627[M-H-CH <sub>3</sub> ] <sup>-</sup><br>254.1321[M-H-CO-CH <sub>3</sub> ] <sup>-</sup>                                                     | DS |
| 69 | Isotanshinone II <sub>A</sub>            | 23.34 | C <sub>19</sub> H <sub>18</sub> O <sub>3</sub>  | 295.1329<br>(0)    | ND                | 277.1215[M+H-H <sub>2</sub> O] <sup>+</sup><br>225.1268[M+H-3CH <sub>2</sub> -CO] <sup>+</sup>                                                                                                                     | ND                                                                                                                                                | DS |
| 70 | Epidanshenspiroketallactone              | 23.51 | C <sub>17</sub> H <sub>16</sub> O <sub>3</sub>  | 269.1171<br>(-0.4) | ND                | 251.1061[M+H-H <sub>2</sub> O] <sup>+</sup><br>223.1118[M+H-H <sub>2</sub> O-CO] <sup>+</sup><br>195.1153[M+H-H <sub>2</sub> O-2CO] <sup>+</sup>                                                                   | ND                                                                                                                                                | DS |
| 71 | Horminon isomer                          | 24.07 | C <sub>20</sub> H <sub>28</sub> O <sub>4</sub>  | 333.2066           | 331.1923          | 315.1944[M+H-H <sub>2</sub> O] <sup>+</sup>                                                                                                                                                                        | 313.1817[M-H-H <sub>2</sub> O] <sup>-</sup>                                                                                                       | DS |

|    |                                   |       |                                                                      |                   |                                                                                                                                                                                              |                                                                                                                                                                                                                |    |
|----|-----------------------------------|-------|----------------------------------------------------------------------|-------------------|----------------------------------------------------------------------------------------------------------------------------------------------------------------------------------------------|----------------------------------------------------------------------------------------------------------------------------------------------------------------------------------------------------------------|----|
|    |                                   |       | (1.6)                                                                | (2.4)             | 287.2042[M+H-H <sub>2</sub> O-CO] <sup>+</sup>                                                                                                                                               | 298.1568[M-H-CH <sub>3</sub> -H <sub>2</sub> O] <sup>-</sup><br>270.1630[M-H-CH <sub>3</sub> -H <sub>2</sub> O-CO] <sup>-</sup><br>227.1084[M-H-C <sub>3</sub> H <sub>6</sub> -2CH <sub>3</sub> ] <sup>-</sup> | DS |
| 72 | Sugiol                            | 24.35 | C <sub>20</sub> H <sub>28</sub> O <sub>2</sub><br>301.2160<br>(-0.6) | 299.2023<br>(2.3) | 259.1689[M+H-C <sub>3</sub> H <sub>6</sub> ] <sup>+</sup><br>213.1277[M+H-H <sub>2</sub> O-CO-C <sub>3</sub> H <sub>6</sub> ] <sup>+</sup>                                                   |                                                                                                                                                                                                                |    |
| 73 | Cryptotanshinone*                 | 24.43 | C <sub>19</sub> H <sub>20</sub> O <sub>3</sub><br>297.1487<br>(0.5)  | ND                | 254.0942[M+H-CO-CH <sub>3</sub> ] <sup>+</sup><br>251.1428[M+H-CO-H <sub>2</sub> O] <sup>+</sup>                                                                                             | ND                                                                                                                                                                                                             | DS |
| 74 | Tanshinone I*                     | 24.59 | C <sub>18</sub> H <sub>12</sub> O <sub>3</sub><br>277.0858<br>(-0.5) | ND                | 249.0906[M+H-CO] <sup>+</sup><br>178.0776[M+H-3CO-CH <sub>3</sub> ] <sup>+</sup>                                                                                                             | ND                                                                                                                                                                                                             | DS |
| 75 | Miltirone I                       | 25.06 | C <sub>18</sub> H <sub>16</sub> O <sub>2</sub><br>265.1221<br>(-0.8) | ND                | 223.0756[M+H-C <sub>3</sub> H <sub>6</sub> ] <sup>+</sup><br>204.0929[M+H-CO-H <sub>2</sub> O-CH <sub>3</sub> ] <sup>+</sup><br>195.0800[M+H-C <sub>3</sub> H <sub>6</sub> -CO] <sup>+</sup> | ND                                                                                                                                                                                                             | DS |
| 76 | Dihydrotanshinone I isomer        | 25.59 | C <sub>18</sub> H <sub>14</sub> O <sub>3</sub><br>279.1015<br>(-0.4) | ND                | 261.0905[M+H-H <sub>2</sub> O] <sup>+</sup><br>205.1012[M+H-2CO-H <sub>2</sub> O] <sup>+</sup>                                                                                               | ND                                                                                                                                                                                                             | DS |
| 77 | Dehydromiltirone/ Sibiriquinone A | 26.62 | C <sub>19</sub> H <sub>20</sub> O <sub>2</sub><br>281.1535<br>(-0.2) | ND                | 221.0963[M+H-4CH <sub>3</sub> ] <sup>+</sup><br>193.1014[M+H-4CH <sub>3</sub> -CO] <sup>+</sup>                                                                                              | ND                                                                                                                                                                                                             | DS |
| 78 | Tanshinone II <sub>A</sub> *      | 27.24 | C <sub>19</sub> H <sub>18</sub> O <sub>3</sub><br>295.1328<br>(-0.3) | ND                | 277.1220[M+H-H <sub>2</sub> O] <sup>+</sup><br>252.0790[M+H-CO-CH <sub>3</sub> ] <sup>+</sup><br>249.1265[M+H-H <sub>2</sub> O-CO] <sup>+</sup>                                              | ND                                                                                                                                                                                                             | DS |
| 79 | Miltirone                         | 28.17 | C <sub>19</sub> H <sub>22</sub> O <sub>2</sub><br>283.1694<br>(0.4)  | ND                | 223.1121[M+H-HOAc] <sup>+</sup><br>208.0889[M+H-CH <sub>3</sub> -HOAc] <sup>+</sup>                                                                                                          | ND                                                                                                                                                                                                             | DS |
| 80 | Salviolone                        | 28.45 | C <sub>18</sub> H <sub>20</sub> O <sub>2</sub><br>269.1535<br>(-0.4) | ND                | 254.1302[M+H-CH <sub>3</sub> ] <sup>+</sup><br>239.1059[M+H-2CH <sub>3</sub> ] <sup>+</sup>                                                                                                  | ND                                                                                                                                                                                                             | DS |
| 81 | Oleanolic acid                    | 31.92 | C <sub>30</sub> H <sub>48</sub> O <sub>3</sub><br>457.3677<br>(0.2)  | 455.3534<br>(0.8) | 439.3573[M+H-H <sub>2</sub> O] <sup>+</sup><br>411.3653[M+H-H <sub>2</sub> O-CO] <sup>+</sup>                                                                                                | 455.3528                                                                                                                                                                                                       | DS |
