# Supplementary material
Source: MDPI journal article supplement (https://www.mdpi.com/1424-8247/17/5/643)
Supplement: s1 [file s1]

**Table S3** Absorbed constituents in rat serum after the oral administration of Fufang Danshen Tablet

| No. | Identification                           | T <sub>R</sub><br>(min) | Formula                                         | [M+H] <sup>+</sup><br>(error, ppm) | [M-H] <sup>-</sup><br>(error, ppm) | Characteristic Fragment                                                                                                                                                                                        |                                                                                                                                                |
|-----|------------------------------------------|-------------------------|-------------------------------------------------|------------------------------------|------------------------------------|----------------------------------------------------------------------------------------------------------------------------------------------------------------------------------------------------------------|------------------------------------------------------------------------------------------------------------------------------------------------|
|     |                                          |                         |                                                 |                                    |                                    | POS                                                                                                                                                                                                            | NEG                                                                                                                                            |
| P1  | Danshensu <sup>*</sup>                   | 4.14                    | C <sub>9</sub> H <sub>10</sub> O <sub>5</sub>   | ND                                 | 197.0458<br>(0.3)                  | ND                                                                                                                                                                                                             | 179.0350[M-H-H <sub>2</sub> O] <sup>-</sup><br>152.8940[M-H-COOH] <sup>-</sup><br>135.0441[M-H-CO <sub>2</sub> -H <sub>2</sub> O] <sup>-</sup> |
| P2  | Ginsenoside F <sub>1</sub>               | 5.64                    | C <sub>36</sub> H <sub>62</sub> O <sub>9</sub>  | 639.4442<br>(-3.9)                 | ND                                 | 621.4514[M+H-H <sub>2</sub> O] <sup>+</sup><br>441.3689[M+H-2H <sub>2</sub> O-Glc] <sup>+</sup><br>423.3499[M+H-3H <sub>2</sub> O-Glc] <sup>+</sup>                                                            | ND                                                                                                                                             |
| P3  | Salvianolic acid D <sup>*</sup>          | 7.15                    | C <sub>20</sub> H <sub>18</sub> O <sub>10</sub> | ND                                 | 417.0823<br>(-1.1)                 | ND                                                                                                                                                                                                             | 197.0419[DSS-H] <sup>-</sup><br>179.0346[C <sub>9</sub> H <sub>8</sub> O <sub>4</sub> -H] <sup>-</sup>                                         |
| P4  | Ginsenoside Rg <sub>1</sub> <sup>*</sup> | 7.47                    | C <sub>42</sub> H <sub>72</sub> O <sub>14</sub> | 801.4996<br>(0.1)                  | ND                                 | 621.4332[M+H-H <sub>2</sub> O-Glc] <sup>+</sup><br>441.3698[M+H-2H <sub>2</sub> O-2Glc] <sup>+</sup><br>423.3593[M+H-3H <sub>2</sub> O-2Glc] <sup>+</sup><br>405.3513[M+H-4H <sub>2</sub> O-2Glc] <sup>+</sup> | ND                                                                                                                                             |
| P5  | Rosmarinic acid <sup>*</sup>             | 8.14                    | C <sub>18</sub> H <sub>16</sub> O <sub>8</sub>  | ND                                 | 359.0775<br>(0.8)                  | ND                                                                                                                                                                                                             | 197.0439[DSS-H] <sup>-</sup><br>161.0253[M-H-DSS] <sup>-</sup>                                                                                 |
| P6  | Salvianolic acid A <sup>*</sup>          | 8.83                    | C <sub>26</sub> H <sub>22</sub> O <sub>10</sub> | ND                                 | 493.1154<br>(2.7)                  | ND                                                                                                                                                                                                             | 313.0682[M-H-CA] <sup>-</sup><br>295.0601[M-H-DSS] <sup>-</sup><br>197.0518[DSS-H] <sup>-</sup>                                                |
| P7  | Lithospermic acid <sup>*</sup>           | 8.84                    | C <sub>27</sub> H <sub>22</sub> O <sub>12</sub> | ND                                 | 537.1046<br>(1.3)                  | ND                                                                                                                                                                                                             | 493.1177[M-H-CO <sub>2</sub> ] <sup>-</sup><br>295.0615[M-H-DSS-CO <sub>2</sub> ] <sup>-</sup>                                                 |
| P8  | Salvianolic acid B <sup>*</sup>          | 11.02                   | C <sub>36</sub> H <sub>30</sub> O <sub>16</sub> | ND                                 | 717.1493<br>(4.5)                  | ND                                                                                                                                                                                                             | 519.0924[M-H-DSS] <sup>-</sup><br>339.0507[M-H-DSS-CA] <sup>-</sup><br>321.0400[M-H-2DSS] <sup>-</sup>                                         |

|     |                                          |       |                                                 |                    |                    |                                                                                                                                                          |                                                                                                 |
|-----|------------------------------------------|-------|-------------------------------------------------|--------------------|--------------------|----------------------------------------------------------------------------------------------------------------------------------------------------------|-------------------------------------------------------------------------------------------------|
| P9  | Ginsenoside Rb <sub>1</sub> <sup>*</sup> | 18.91 | C <sub>54</sub> H <sub>92</sub> O <sub>23</sub> | 1109.6155<br>(4.8) | 1107.6043<br>(7.8) | 767.4861[M+H-2Glc-H <sub>2</sub> O] <sup>+</sup><br>325.1125[2Glc+H] <sup>+</sup>                                                                        | 1107.6041[M-H] <sup>-</sup>                                                                     |
| P10 | Ginsenoside Rd <sup>*</sup>              | 19.25 | C <sub>48</sub> H <sub>82</sub> O <sub>18</sub> | 947.5579<br>(0.6)  | 945.5454<br>(2.7)  | 767.4939[M+H-Glc-H <sub>2</sub> O] <sup>+</sup><br>605.4418[M+H-2Glc-H <sub>2</sub> O] <sup>+</sup><br>425.3773[M+H-3Glc-2H <sub>2</sub> O] <sup>+</sup> | 945.5396[M-H] <sup>-</sup><br>783.4673[M-H-Glc] <sup>-</sup>                                    |
| P11 | Salvianolic acid C <sup>*</sup>          | 19.65 | C <sub>26</sub> H <sub>20</sub> O <sub>10</sub> | ND                 | 491.0989<br>(1.1)  | ND                                                                                                                                                       | 293.0443[M-H-DSS] <sup>-</sup><br>197.0516[DSS-H] <sup>-</sup>                                  |
| P12 | Przewaquinone B                          | 19.85 | C <sub>18</sub> H <sub>12</sub> O <sub>4</sub>  | 293.0811<br>(0.8)  | ND                 | 249.0876[M+H-CO <sub>2</sub> ] <sup>+</sup><br>178.0767[M+H-2CO-CH <sub>3</sub> -CO <sub>2</sub> ] <sup>+</sup>                                          | ND                                                                                              |
| P13 | Tanshinol B                              | 20.22 | C <sub>18</sub> H <sub>16</sub> O <sub>4</sub>  | 297.1124<br>(0.9)  | ND                 | 279.1039[M+H-H <sub>2</sub> O] <sup>+</sup><br>261.0918[M+H-2H <sub>2</sub> O] <sup>+</sup><br>233.0976[M+H-2H <sub>2</sub> O-CO] <sup>+</sup>           | ND                                                                                              |
| P14 | Tanshinone II <sub>B</sub>               | 20.57 | C <sub>19</sub> H <sub>18</sub> O <sub>4</sub>  | 311.1278<br>(0)    | ND                 | 267.1373[M+H-CO <sub>2</sub> ] <sup>+</sup><br>252.1152[M+H-CO <sub>2</sub> -CH <sub>3</sub> ] <sup>+</sup>                                              | ND                                                                                              |
| P15 | Salvianonol                              | 20.62 | C <sub>18</sub> H <sub>20</sub> O <sub>4</sub>  | 301.1427<br>(-0.1) | ND                 | 283.1345[M+H-H <sub>2</sub> O] <sup>+</sup><br>265.1228[M+H-2H <sub>2</sub> O] <sup>+</sup><br>241.1209[M+H-COOH-CH <sub>3</sub> ] <sup>+</sup>          | ND                                                                                              |
| P16 | Danshenxinkun A                          | 21.31 | C <sub>18</sub> H <sub>16</sub> O <sub>4</sub>  | 297.1122<br>(0.1)  | 295.0979<br>(1.2)  | 261.0912[M+H-2H <sub>2</sub> O] <sup>+</sup><br>233.0963[M+H-2H <sub>2</sub> O-CO] <sup>+</sup>                                                          | 265.0863[M-H-2CH <sub>3</sub> ] <sup>-</sup><br>237.0917[M-H-2CH <sub>3</sub> -CO] <sup>-</sup> |
| P17 | Dihydrotanshinone I <sup>*</sup>         | 22.43 | C <sub>18</sub> H <sub>14</sub> O <sub>3</sub>  | 279.1014<br>(-0.5) | ND                 | 261.0903[M+H-H <sub>2</sub> O] <sup>+</sup><br>205.1004[M+H-2CO-H <sub>2</sub> O] <sup>+</sup>                                                           | ND                                                                                              |
| P18 | Neocryptotanshinone                      | 22.76 | C <sub>19</sub> H <sub>22</sub> O <sub>4</sub>  | 315.1594<br>(0.9)  | 313.1444<br>(-0.5) | 297.1488[M+H-H <sub>2</sub> O] <sup>+</sup><br>279.1372[M+H-2H <sub>2</sub> O] <sup>+</sup>                                                              | 283.135 [M-H-2CH <sub>3</sub> ] <sup>-</sup><br>255.1404[M-H-2CH <sub>3</sub> -CO] <sup>-</sup> |
| P19 | Epidanshenspiroketallactone              | 23.50 | C <sub>17</sub> H <sub>16</sub> O <sub>3</sub>  | 269.1172<br>(0)    | ND                 | 251.1089[M+H-H <sub>2</sub> O] <sup>+</sup><br>223.1100[M+H-H <sub>2</sub> O-CO] <sup>+</sup><br>177.0068[M+H-2H <sub>2</sub> O-2CO] <sup>+</sup>        | ND                                                                                              |

|     |                                         |       |                                                |                    |    |                                                                                                                                                 |    |
|-----|-----------------------------------------|-------|------------------------------------------------|--------------------|----|-------------------------------------------------------------------------------------------------------------------------------------------------|----|
| P20 | Cryptotanshinone <sup>*</sup>           | 24.42 | C <sub>19</sub> H <sub>20</sub> O <sub>3</sub> | 297.1488<br>(0.9)  | ND | 282.1314[M+H-CH <sub>3</sub> ] <sup>+</sup><br>251.1449[M+H-CO-H <sub>2</sub> O] <sup>+</sup>                                                   | ND |
| P21 | Tanshinone I <sup>*</sup>               | 24.52 | C <sub>18</sub> H <sub>12</sub> O <sub>3</sub> | 277.0858<br>(-0.3) | ND | 249.0914[M+H-CO] <sup>+</sup><br>178.0779[M+H-3CO-CH <sub>3</sub> ] <sup>+</sup>                                                                | ND |
| P22 | Tanshinone II <sub>A</sub> <sup>*</sup> | 27.24 | C <sub>19</sub> H <sub>18</sub> O <sub>3</sub> | 295.1326<br>(-1)   | ND | 277.1217[M+H-H <sub>2</sub> O] <sup>+</sup><br>252.0777[M+H-CO-CH <sub>3</sub> ] <sup>+</sup><br>249.1264[M+H-H <sub>2</sub> O-CO] <sup>+</sup> | ND |

---

Note: <sup>\*</sup>Positively identified via comparison with authentic standards. ND, Not detected; DSS, C<sub>9</sub>H<sub>10</sub>O<sub>5</sub> (Danshensu); CA, C<sub>9</sub>H<sub>8</sub>O<sub>4</sub> (Caffeic acid); Glc, glucose; GlcUA, glucuronyl moiety.
