# Supplementary material
Source: MDPI journal article supplement (https://www.mdpi.com/1424-8247/17/5/643)
Supplement: s1 [file s1]

Table S1. Ingredients of Fufang Danshen Tablet (FDT)

| Chinese name | Herb                                                      | Latin name                             | Medicinal part          |
|--------------|-----------------------------------------------------------|----------------------------------------|-------------------------|
| Dan-Shen     | <i>Salvia miltiorrhiza</i> Bunge                          | Salviae Miltiorrhizar Radix et Rhizoma | Dried roots and rhizome |
| San-Qi       | <i>Panax notoginseng</i> (Burkill)<br>F. H. Chen ex C. H. | Notoginseng Radix et Rhizoma           | Dried roots and rhizome |
| Bing-Pian    | /                                                         | Borneolum syntheticum                  | /                       |
